# Supplementary material
Source: PubMed Central journal article supplement (PMC9562103)

## Supplemental Online Content

Henderson TO, Liu Q, Turcotte LM, Neglia JP, Leisenring W, et al. Association of changes in cancer therapy over 3 decades with risk of subsequent breast cancer among female childhood cancer survivors: a report from the Childhood Cancer Survivor Study (CCSS). *JAMA Oncol*. Published online October 13, 2022. doi:10.1001/jamaoncol.2022.4649

**eTable 1.** Demographic Characteristics of Female Survivors of Childhood Cancer with Invasive BC and DCIS

**eTable 2.** Clinical Characteristics of Breast Cancers

**eTable 3.** Treatment exposures for HL survivors and all survivors other than HL

**eTable 4.** Cumulative incidence (%) for survivors diagnosed 0-9 years of age

**eTable 5.** Cumulative incidence (%) for survivors diagnosed 10-20 years of age

**eTable 6.** Cumulative incidence (%) by age for all breast cancers, invasive breast cancer and DCIS

**eTable 7.** SIRs (95% CI) by age by treatment decade

**eFigure 1.** Cumulative incidence (%) curves by treatment decade among survivors diagnosed in 0-9 years old for all breast cancers, invasive breast cancer and DCIS (A. All childhood cancer survivors; B. All survivors except HL)

**eFigure 2.** Cumulative incidence (%) curves by treatment decade among survivors diagnosed in 10-20 years old for all breast cancers

**eFigure 3.** Cumulative incidence (%) curves by treatment decade among survivors diagnosed in 10-20 years old for all breast cancers, invasive breast cancer and DCIS (A. HL survivors with chest RT; B. All survivors except HL)

**eFigure 4.** SIRs (95% CI) of all breast cancers by age by treatment decade in all survivors and HL survivors

**eFigure 5.** SIRs (95% CI) by age by treatment decade in all survivors stratified by exposure to chest radiotherapy

This supplemental material has been provided by the authors to give readers additional information about their work.

**eTable 1. Demographic Characteristics of Female Survivors of Childhood Cancer with Invasive BC and DCIS<sup>†</sup>**

| Characteristic                                      | Decade                 |    |                |    |                        |    |                |    |                       |    |                |    |
|-----------------------------------------------------|------------------------|----|----------------|----|------------------------|----|----------------|----|-----------------------|----|----------------|----|
|                                                     | 1970-1979              |    |                |    | 1980-1989              |    |                |    | 1990-1999             |    |                |    |
|                                                     | Invasive BC<br>(N=206) |    | DCIS<br>(N=65) |    | Invasive BC<br>(N=141) |    | DCIS<br>(N=52) |    | Invasive BC<br>(N=37) |    | DCIS<br>(N=24) |    |
|                                                     | N                      | %  | N              | %  | N                      | %  | N              | %  | N                     | %  | N              | %  |
| Childhood cancer diagnosis                          |                        |    |                |    |                        |    |                |    |                       |    |                |    |
| Leukemia                                            | 23                     | 11 | 7              | 11 | 27                     | 21 | 4              | 8  | 3                     | 14 | 2              | 9  |
| CNS                                                 | 6                      | 3  | 1              | 2  | 1                      | 1  | 0              | 0  | 0                     | 0  | 1              | 4  |
| Hodgkin lymphoma                                    | 116                    | 56 | 43             | 66 | 72                     | 50 | 30             | 58 | 21                    | 53 | 17             | 70 |
| Non-Hodgkin lymphoma                                | 6                      | 3  | 0              | 0  | 10                     | 7  | 5              | 10 | 2                     | 5  | 0              | 0  |
| Wilms tumor                                         | 13                     | 6  | 1              | 2  | 5                      | 3  | 4              | 8  | 0                     | 0  | 0              | 0  |
| Neuroblastoma                                       | 5                      | 2  | 1              | 2  | 2                      | 1  | 0              | 0  | 0                     | 0  | 1              | 4  |
| Bone cancer                                         | 27                     | 13 | 8              | 12 | 21                     | 15 | 8              | 15 | 11                    | 28 | 3              | 12 |
| Soft tissue sarcoma                                 | 10                     | 5  | 4              | 6  | 3                      | 2  | 1              | 2  | 0                     | 0  | 0              | 0  |
| Chest RT                                            |                        |    |                |    |                        |    |                |    |                       |    |                |    |
| No                                                  | 56                     | 29 | 17             | 27 | 46                     | 37 | 18             | 38 | 15                    | 48 | 3              | 12 |
| Yes                                                 | 136                    | 71 | 46             | 73 | 82                     | 63 | 29             | 62 | 19                    | 52 | 21             | 88 |
| Primary chest radiation field                       |                        |    |                |    |                        |    |                |    |                       |    |                |    |
| None                                                | 56                     | 29 | 17             | 27 | 46                     | 37 | 18             | 38 | 15                    | 48 | 3              | 12 |
| Mantle                                              | 97                     | 51 | 38             | 60 | 63                     | 48 | 26             | 55 | 10                    | 27 | 15             | 62 |
| Mediastinal/IFRT                                    | 14                     | 7  | 4              | 6  | 5                      | 4  | 1              | 2  | 3                     | 8  | 0              | 0  |
| Whole lung                                          | 16                     | 8  | 1              | 2  | 3                      | 2  | 2              | 4  | 1                     | 3  | 1              | 4  |
| TBI                                                 | 1                      | 1  | 0              | 0  | 8                      | 6  | 0              | 0  | 3                     | 8  | 4              | 17 |
| Spine                                               | 3                      | 2  | 3              | 5  | 0                      | 0  | 0              | 0  | 0                     | 0  | 0              | 0  |
| Other                                               | 5                      | 3  | 0              | 0  | 3                      | 2  | 0              | 0  | 2                     | 5  | 1              | 4  |
| Chest radiation dose, Gy                            |                        |    |                |    |                        |    |                |    |                       |    |                |    |
| None                                                | 56                     | 29 | 17             | 27 | 46                     | 38 | 18             | 38 | 15                    | 48 | 3              | 12 |
| < 10                                                | 1                      | 1  | 0              | 0  | 1                      | 1  | 1              | 2  | 0                     | 0  | 0              | 0  |
| 10-19                                               | 19                     | 10 | 3              | 5  | 11                     | 8  | 2              | 4  | 5                     | 14 | 4              | 17 |
| 20-29                                               | 12                     | 6  | 5              | 8  | 15                     | 12 | 9              | 19 | 8                     | 22 | 12             | 50 |
| 30-39                                               | 49                     | 26 | 19             | 30 | 24                     | 19 | 7              | 15 | 1                     | 3  | 3              | 12 |
| 40+                                                 | 54                     | 28 | 19             | 30 | 30                     | 23 | 10             | 21 | 5                     | 14 | 2              | 8  |
| Alkylating agents                                   |                        |    |                |    |                        |    |                |    |                       |    |                |    |
| No                                                  | 100                    | 52 | 31             | 49 | 47                     | 35 | 23             | 45 | 8                     | 21 | 6              | 25 |
| Yes                                                 | 93                     | 48 | 32             | 51 | 83                     | 65 | 28             | 55 | 27                    | 79 | 18             | 75 |
| Cyclophosphamide equivalent dose, mg/m <sup>2</sup> |                        |    |                |    |                        |    |                |    |                       |    |                |    |
| 0                                                   | 100                    | 57 | 31             | 65 | 47                     | 41 | 23             | 53 | 8                     | 22 | 6              | 26 |
| 1-5,999                                             | 13                     | 7  | 3              | 6  | 18                     | 18 | 6              | 14 | 11                    | 37 | 4              | 17 |
| 6,000-17,999                                        | 51                     | 29 | 11             | 23 | 44                     | 38 | 14             | 33 | 10                    | 27 | 11             | 48 |
| ≥18,000                                             | 11                     | 6  | 3              | 6  | 4                      | 3  | 0              | 0  | 5                     | 14 | 2              | 9  |
| Anthracyclines                                      |                        |    |                |    |                        |    |                |    |                       |    |                |    |
| No                                                  | 146                    | 75 | 48             | 75 | 58                     | 43 | 17             | 33 | 3                     | 8  | 2              | 8  |
| Yes                                                 | 49                     | 25 | 16             | 25 | 73                     | 57 | 34             | 67 | 32                    | 92 | 22             | 92 |
| Anthracycline cumulative dose, mg/m <sup>2</sup>    |                        |    |                |    |                        |    |                |    |                       |    |                |    |
| 0                                                   | 146                    | 76 | 48             | 80 | 58                     | 46 | 17             | 37 | 3                     | 8  | 2              | 8  |
| 1-249                                               | 13                     | 7  | 3              | 5  | 32                     | 27 | 13             | 28 | 17                    | 54 | 13             | 54 |
| ≥ 250                                               | 32                     | 17 | 9              | 15 | 34                     | 27 | 16             | 35 | 14                    | 38 | 9              | 38 |
| Pelvic radiation                                    |                        |    |                |    |                        |    |                |    |                       |    |                |    |
| No                                                  | 141                    | 73 | 46             | 73 | 93                     | 73 | 35             | 74 | 27                    | 81 | 16             | 66 |
| Yes                                                 | 51                     | 27 | 17             | 27 | 35                     | 27 | 12             | 26 | 7                     | 19 | 8              | 34 |

Abbreviations: CNS, central nervous system; radiation therapy: RT; involved field radiation therapy (IFRT), TBI: total body irradiation therapy  
<sup>†</sup>Individual patients could be included in both invasive BC and DCIS columns.

\*Analyses, including reported percentages and means/medians, were weighted to account for under-sampling of acute lymphoblastic leukemia (ALL) survivors (1987-1999).

**eTable 2. Clinical Characteristics of Breast Cancers**

| Clinical Characteristic                                                                          | Total<br>N (%)                | Chest<br>Radiotherapy -<br>Yes | Chest<br>Radiotherapy -<br>No |
|--------------------------------------------------------------------------------------------------|-------------------------------|--------------------------------|-------------------------------|
| Median Time from primary diagnosis to diagnosis of BC, years, median (Range)<br>Quartiles: Q1-Q3 | 25.6 (6.7-47.4)<br>19.8-30.5  | 24.9 (6.7-47.4)<br>19.4-30.5   | 27.2 (7.4-45.6)<br>21.9-31.5  |
| Age at diagnosis of BC, years, mediana (Range)<br>Quartiles: Q1-Q3                               | 40.3 (19.9-62.1)<br>34.7-45.2 | 40.0 (19.9-62.1)<br>35.1-45.7  | 40.5 (20.9-59.0)<br>34.3-44.6 |
| Site of BC                                                                                       |                               |                                |                               |
| Unilateral                                                                                       | 398 (81.4)                    | 236 (77.6)                     | 130 (87.8)                    |
| Bilateral breast cancer                                                                          | 86 (17.6)                     | 63* (20.7)                     | 18 (12.2)                     |
| -Metachronous                                                                                    | 44 (9.0)                      | 32 (10.5)                      | 10 (6.8)                      |
| -Synchronous                                                                                     | 40 (8.2)                      | 29 (9.5)                       | 8 (5.4)                       |
| -bilateral time Cannot be determined                                                             | 2 (0.4)                       | 2 (0.7)                        | 0                             |
| Unilateral/Bilateral cannot be determined                                                        | 5 (1.0)                       | 5 (1.6)                        | 0                             |
| <b>BC Receptor Status (Invasive +DCIS)</b>                                                       |                               |                                |                               |
| ER                                                                                               |                               |                                |                               |
| Yes                                                                                              | 325 (56)                      | 202 (54)                       | 101 (62)                      |
| No                                                                                               | 74 (13)                       | 45 (12)                        | 25 (15)                       |
| Not available                                                                                    | 119 (20)                      | 83 (22)                        | 24 (14)                       |
| Missing                                                                                          | 65 (11)                       | 45 (12)                        | 16 (9)                        |
| PR                                                                                               |                               |                                |                               |
| Yes                                                                                              | 268 (46)                      | 164 (44)                       | 85 (51)                       |
| No                                                                                               | 109 (19)                      | 68 (18)                        | 36 (23)                       |
| Not available                                                                                    | 140 (24)                      | 97 (26)                        | 29 (17)                       |
| Missing                                                                                          | 66 (11)                       | 46 (12)                        | 16 (9)                        |
| HER-2                                                                                            |                               |                                |                               |
| Yes                                                                                              | 62 (11)                       | 35 (9)                         | 22 (13)                       |
| No                                                                                               | 214 (37)                      | 122 (33)                       | 77 (48)                       |
| Not available                                                                                    | 239 (41)                      | 172 (46)                       | 49 (29)                       |
| Missing                                                                                          | 68 (12)                       | 46 (12)                        | 18 (11)                       |
| <b>BC Receptor Status (Invasive BC only)</b>                                                     |                               |                                |                               |
| ER                                                                                               |                               |                                |                               |
| Yes                                                                                              | 262 (62)                      | 165 (62)                       | 79 (63)                       |
| No                                                                                               | 65 (15)                       | 38 (14)                        | 23 (17)                       |
| Not available                                                                                    | 62 (14)                       | 39 (15)                        | 15 (11)                       |
| Missing                                                                                          | 38 (9)                        | 24 (9)                         | 11 (8)                        |
| PR                                                                                               |                               |                                |                               |
| Yes                                                                                              | 218 (51)                      | 135 (51)                       | 66 (52)                       |
| No                                                                                               | 96 (23)                       | 60 (23)                        | 32 (26)                       |
| Not available                                                                                    | 74 (17)                       | 46 (17)                        | 19 (14)                       |
| Missing                                                                                          | 39 (9)                        | 25 (9)                         | 11 (8)                        |
| HER-2                                                                                            |                               |                                |                               |
| Yes                                                                                              | 58 (13)                       | 31 (12)                        | 22 (17)                       |
| No                                                                                               | 200 (47)                      | 115 (43)                       | 70 (56)                       |
| Not available                                                                                    | 129 (30)                      | 95 (36)                        | 24 (18)                       |
| Missing                                                                                          | 40 (9)                        | 25 (9)                         | 12 (9)                        |

\*The chest radiotherapy fields of the 63 women are: 2 TBI, 4 whole lung, 52 Mantle, 4 Mediastinal/IFRT and 1 other chest. Bilateral breast cancer (BC) definitions: Synchronous (2 BCs within 12 months); metachronous (2 BCs>12 months apart).

**eTable 3. Treatment exposures for HL survivors and all survivors other than HL**

| Characteristics                                | HL survivors |          |          | All survivors other than HL |            |            |            |            |
|------------------------------------------------|--------------|----------|----------|-----------------------------|------------|------------|------------|------------|
|                                                | Total        | 1970s    | 1980s    | 1990s                       | Total      | 1970s      | 1980s      | 1990s      |
| Chest or TBI, yes/no                           |              |          |          |                             |            |            |            |            |
| No                                             | 235 (18)     | 42 (9)   | 68 (16)  | 125 (28)                    | 7,603 (85) | 1,646 (79) | 2,978 (85) | 2,979 (88) |
| Yes                                            | 1,097 (82)   | 415 (91) | 357 (84) | 325 (72)                    | 1,525 (15) | 441 (21)   | 562 (15)   | 522 (12)   |
| Received anthracyclines                        |              |          |          |                             |            |            |            |            |
| No                                             | 693 (51)     | 400 (87) | 245 (57) | 48 (10)                     | 4,896 (47) | 1,404 (66) | 1,843 (48) | 1,649 (38) |
| Yes                                            | 664 (49)     | 58 (13)  | 187 (43) | 419 (90)                    | 4,450 (53) | 729 (34)   | 1,776 (52) | 1,945 (62) |
| Pelvis or TBI, yes/no                          |              |          |          |                             |            |            |            |            |
| No                                             | 939 (70)     | 257 (56) | 293 (69) | 389 (86)                    | 7,532 (85) | 1,638 (78) | 2,962 (85) | 2,932 (87) |
| Yes                                            | 393 (30)     | 200 (44) | 132 (31) | 61 (14)                     | 1,597 (15) | 450 (22)   | 578 (15)   | 569 (13)   |
| Chest RT by anthracycline (mg/m <sup>2</sup> ) |              |          |          |                             |            |            |            |            |
| No chest, no anthracycline                     | 52 (4)       | 32 (7)   | 17 (4)   | 3 (1)                       | 3,996 (41) | 1,067 (54) | 1,546 (43) | 1,383 (35) |
| No chest, anthracycline (1-249)                | 131 (10)     | 2 (0)    | 24 (6)   | 105 (24)                    | 2,101 (32) | 197 (10)   | 784 (27)   | 1,120 (44) |
| No chest, anthracycline (≥250)                 | 39 (3)       | 6 (1)    | 20 (5)   | 13 (3)                      | 1,218 (12) | 291 (15)   | 524 (15)   | 403 (10)   |
| chest RT, no anthracycline                     | 615 (48)     | 357 (82) | 214 (54) | 44 (10)                     | 756 (7)    | 288 (15)   | 244 (7)    | 224 (5)    |
| chest RT, anthracycline (1-249)                | 315 (25)     | 11 (3)   | 89 (22)  | 215 (50)                    | 420 (5)    | 58 (3)     | 174 (5)    | 188 (5)    |
| chest RT, anthracycline (≥250)                 | 118 (9)      | 30 (7)   | 35 (9)   | 53 (12)                     | 266 (3)    | 66 (3)     | 112 (3)    | 88 (2)     |

Abbreviations: CNS, central nervous system; TBI: total body irradiation RT, radiation therapy

\*Analyses, including reported percentages and means/medians, were weighted to account for undersampling of acute lymphoblastic leukemia (ALL) survivors (1987-1999).

**eTable 4. Cumulative incidence (%) for survivors diagnosed 0-9 years of age**

|                    | <b>By age 30 yr<br/>% (95% CI)</b> | <b>By age 35 yr<br/>% (95% CI)</b> | <b>By age 40 yr<br/>% (95% CI)</b> | <b>By age 45 yr<br/>% (95% CI)</b> |
|--------------------|------------------------------------|------------------------------------|------------------------------------|------------------------------------|
| <b>All BC</b>      |                                    |                                    |                                    |                                    |
| Entire cohort      |                                    |                                    |                                    |                                    |
| All years          | 0.2 (0.1 - 0.3)                    | 0.7 (0.4 - 1.0)                    | 1.3 (0.9 - 1.8)                    | 2.9 (2.1 - 3.8)                    |
| 1970s              | 0.3 (0.0 - 0.6)                    | 0.8 (0.3 - 1.2)                    | 1.2 (0.6 - 1.8)                    | 2.7 (1.7 - 3.7)                    |
| 1980s              | 0.2 (0.0 - 0.3)                    | 0.7 (0.3 - 1.1)                    | 1.6 (0.8 - 2.4)                    | 3.5 (1.4 - 5.6)                    |
| 1990s              | 0.0 (0.0 - 0.1)                    | 0.5 (0.0 - 1.2)                    |                                    |                                    |
| Non-HL survivors   |                                    |                                    |                                    |                                    |
| All years          | 0.2 (0.1 - 0.3)                    | 0.7 (0.5 - 1.0)                    | 1.4 (0.9 - 1.8)                    | 2.8 (1.9 - 3.6)                    |
| 1970s              | 0.3 (0.0 - 0.6)                    | 0.8 (0.3 - 1.2)                    | 1.3 (0.7 - 1.9)                    | 2.6 (1.7 - 3.6)                    |
| 1980s              | 0.2 (0.0 - 0.3)                    | 0.7 (0.4 - 1.1)                    | 1.6 (0.8 - 2.4)                    | 2.8 (1.2 - 4.4)                    |
| 1990s              | 0.0 (0.0 - 0.1)                    | 0.6 (0.0 - 1.3)                    |                                    |                                    |
| <b>Invasive BC</b> |                                    |                                    |                                    |                                    |
| Entire cohort      |                                    |                                    |                                    |                                    |
| All years          | 0.1 (0.0 - 0.2)                    | 0.7 (0.4 - 0.9)                    | 1.1 (0.7 - 1.5)                    | 2.2 (1.5 - 2.9)                    |
| 1970s              | 0.2 (0.0 - 0.5)                    | 0.7 (0.3 - 1.1)                    | 1.1 (0.5 - 1.6)                    | 1.9 (1.1 - 2.7)                    |
| 1980s              | 0.1 (0.0 - 0.3)                    | 0.6 (0.3 - 1.0)                    | 1.3 (0.6 - 2.1)                    | 3.3 (1.1 - 5.3)                    |
| 1990s              | 0.0 (0.0 - 0.1)                    | 0.5 (0.0 - 1.2)                    |                                    |                                    |
| Non-HL survivors   |                                    |                                    |                                    |                                    |
| All years          | 0.1 (0.0 - 0.2)                    | 0.7 (0.4 - 0.9)                    | 1.2 (0.8 - 1.6)                    | 2.2 (1.4 - 2.9)                    |
| 1970s              | 0.3 (0.0 - 0.5)                    | 0.7 (0.3 - 1.2)                    | 1.1 (0.6 - 1.7)                    | 2.0 (1.2 - 2.8)                    |
| 1980s              | 0.1 (0.0 - 0.3)                    | 0.6 (0.3 - 1.0)                    | 1.4 (0.6 - 2.1)                    | 2.6 (1.0 - 4.1)                    |
| 1990s              | 0.0 (0.0 - 0.1)                    | 0.6 (0.0 - 1.3)                    |                                    |                                    |

**eTable 5. Cumulative incidence (%) for survivors diagnosed 10-20 years of age**

|                            | By age 30 yr<br>% (95% CI) | By age 35 yr<br>% (95% CI) | By age 40 yr<br>% (95% CI) | By age 45 yr<br>% (95% CI) | By age 50 yr<br>% (95% CI) |
|----------------------------|----------------------------|----------------------------|----------------------------|----------------------------|----------------------------|
| <b>All BC</b>              |                            |                            |                            |                            |                            |
| Entire cohort              |                            |                            |                            |                            |                            |
| All years                  | 0.8 (0.6 - 1.1)            | 2.6 (2.1 - 3.1)            | 6.3 (5.4 - 7.1)            | 11.5 (10.2 - 12.8)         | 17.8 (16.0 - 19.6)         |
| 1970s                      | 1.2 (0.5 - 1.8)            | 3.1 (2.1 - 4.1)            | 8.4 (6.7 - 10.0)           | 13.5 (11.4 - 15.6)         | 19.6 (17.0 - 22.1)         |
| 1980s                      | 0.7 (0.3 - 1.1)            | 2.5 (1.7 - 3.3)            | 5.4 (4.2 - 6.6)            | 10.5 (8.6 - 12.3)          | 16.7 (13.9 - 19.5)         |
| 1990s                      | 0.8 (0.3 - 1.2)            | 2.5 (1.7 - 3.3)            | 5.3 (3.5 - 7.0)            | 12.0 (6.4 - 17.3)          |                            |
| HL survivors               |                            |                            |                            |                            |                            |
| All years                  | 1.3 (0.7 - 2.0)            | 5.3 (4.0 - 6.6)            | 12.5 (10.5 - 14.5)         | 20.0 (17.3 - 22.6)         | 30.2 (26.5 - 33.6)         |
| 1970s                      | 2.0 (0.7 - 3.3)            | 4.9 (2.9 - 6.9)            | 14.4 (11.0 - 17.7)         | 21.5 (17.4 - 25.4)         | 31.3 (26.4 - 35.9)         |
| 1980s                      | 1.0 (0.0 - 1.9)            | 5.4 (3.2 - 7.6)            | 11.7 (8.4 - 14.9)          | 19.0 (14.7 - 23.1)         | 28.7 (22.8 - 34.2)         |
| 1990s                      | 1.0 (0.0 - 2.0)            | 5.8 (3.3 - 8.1)            | 10.0 (6.2 - 13.7)          | 19.9 (10.1 - 28.6)         |                            |
| HL survivors with chest RT |                            |                            |                            |                            |                            |
| All years                  | 1.4 (0.7 - 2.2)            | 5.8 (4.3 - 7.3)            | 14.4 (12.0 - 16.8)         | 21.4 (18.4 - 24.3)         | 32.5 (28.5 - 36.4)         |
| 1970s                      | 2.1 (0.7 - 3.6)            | 5.0 (2.8 - 7.2)            | 15.9 (12.1 - 19.6)         | 22.9 (18.3 - 27.1)         | 33.4 (28.0 - 38.4)         |
| 1980s                      | 1.0 (0.0 - 2.0)            | 6.3 (3.6 - 9.0)            | 13.7 (9.7 - 17.5)          | 20.5 (15.5 - 25.2)         | 31.9 (24.9 - 38.3)         |
| 1990s                      | 1.1 (0.0 - 2.3)            | 6.5 (3.5 - 9.5)            | 12.2 (7.2 - 16.9)          | 20.5 (9.3 - 30.3)          |                            |
| Non-HL survivors           |                            |                            |                            |                            |                            |
| All years                  | 0.6 (0.3 - 0.9)            | 1.4 (1.0 - 1.9)            | 3.2 (2.5 - 4.0)            | 7.1 (5.8 - 8.4)            | 11.0 (9.1 - 12.8)          |
| 1970s                      | 0.6 (0.0 - 1.2)            | 1.8 (0.8 - 2.9)            | 4.2 (2.6 - 5.7)            | 8.0 (5.8 - 10.2)           | 11.5 (8.7 - 14.1)          |
| 1980s                      | 0.6 (0.1 - 1.0)            | 1.3 (0.6 - 2.0)            | 2.8 (1.7 - 3.9)            | 6.8 (5.0 - 8.6)            | 10.9 (8.1 - 13.6)          |
| 1990s                      | 0.7 (0.2 - 1.2)            | 1.2 (0.5 - 1.9)            | 3.2 (1.4 - 5.0)            | 6.6 (1.5 - 11.3)           |                            |
| <b>Invasive BC</b>         |                            |                            |                            |                            |                            |
| Entire cohort              |                            |                            |                            |                            |                            |
| All years                  | 0.8 (0.5 - 1.1)            | 2.2 (1.7 - 2.6)            | 4.6 (3.9 - 5.4)            | 8.8 (7.7 - 9.9)            | 14.0 (12.4 - 15.7)         |
| 1970s                      | 1.2 (0.5 - 1.8)            | 2.7 (1.8 - 3.7)            | 6.4 (4.9 - 7.9)            | 11.1 (9.1 - 13.0)          | 16.1 (13.7 - 18.5)         |
| 1980s                      | 0.7 (0.3 - 1.1)            | 2.1 (1.4 - 2.9)            | 4.1 (3.1 - 5.2)            | 7.9 (6.3 - 9.4)            | 13.2 (10.6 - 15.7)         |
| 1990s                      | 0.6 (0.2 - 1.0)            | 1.8 (1.1 - 2.6)            | 3.3 (2.0 - 4.7)            | 6.3 (3.2 - 9.4)            |                            |
| HL survivors               |                            |                            |                            |                            |                            |
| All years                  | 1.2 (0.6 - 1.8)            | 4.1 (3.0 - 5.2)            | 8.6 (6.9 - 10.2)           | 14.9 (12.5 - 17.2)         | 23.3 (19.9 - 26.5)         |
| 1970s                      | 2.0 (0.7 - 3.3)            | 4.2 (2.4 - 6.1)            | 10.2 (7.3 - 13.0)          | 17.0 (13.3 - 20.6)         | 24.7 (20.2 - 29.0)         |
| 1980s                      | 1.0 (0.0 - 1.9)            | 4.2 (2.2 - 6.1)            | 8.3 (5.5 - 11.0)           | 14.0 (10.2 - 17.6)         | 22.9 (17.3 - 28.1)         |
| 1990s                      | 0.5 (0.0 - 1.2)            | 3.8 (1.8 - 5.8)            | 6.4 (3.2 - 9.5)            | 9.3 (4.7 - 13.7)           |                            |
| HL survivors with chest RT |                            |                            |                            |                            |                            |
| All years                  | 1.3 (0.6 - 2.1)            | 4.4 (3.1 - 5.7)            | 9.8 (7.8 - 11.8)           | 15.7 (13.0 - 18.3)         | 25.0 (21.2 - 28.5)         |
| 1970s                      | 2.1 (0.7 - 3.6)            | 4.2 (2.2 - 6.3)            | 11.2 (7.9 - 14.4)          | 17.9 (13.8 - 21.8)         | 26.0 (21.0 - 30.7)         |
| 1980s                      | 1.0 (0.0 - 2.0)            | 4.7 (2.4 - 7.0)            | 9.6 (6.2 - 12.9)           | 15.2 (10.8 - 19.4)         | 26.2 (19.5 - 32.3)         |
| 1990s                      | 0.7 (0.0 - 1.7)            | 4.2 (1.7 - 6.6)            | 7.5 (3.4 - 11.4)           | 7.5 (3.4 - 11.4)           |                            |
| Non-HL survivors           |                            |                            |                            |                            |                            |
| All years                  | 0.6 (0.3 - 0.9)            | 1.3 (0.9 - 1.7)            | 2.7 (2.0 - 3.4)            | 5.6 (4.5 - 6.8)            | 8.9 (7.2 - 10.6)           |
| 1970s                      | 0.6 (0.0 - 1.2)            | 1.7 (0.7 - 2.7)            | 3.8 (2.3 - 5.3)            | 7.0 (4.9 - 9.0)            | 10.2 (7.6 - 12.7)          |
| 1980s                      | 0.6 (0.1 - 1.0)            | 1.3 (0.6 - 2.0)            | 2.5 (1.5 - 3.4)            | 5.2 (3.6 - 6.8)            | 8.2 (5.7 - 10.6)           |
| 1990s                      | 0.7 (0.2 - 1.2)            | 1.0 (0.4 - 1.6)            | 1.9 (0.6 - 3.1)            | 5.3 (0.4 - 10.0)           |                            |
| <b>DCIS</b>                |                            |                            |                            |                            |                            |
| Entire cohort              |                            |                            |                            |                            |                            |
| All years                  | 0.1 (0.0 - 0.2)            | 0.7 (0.5 - 1.0)            | 2.1 (1.6 - 2.6)            | 3.7 (2.9 - 4.4)            | 5.2 (4.2 - 6.2)            |
| 1970s                      | 0.0 (0.0 - 0.0)            | 0.5 (0.1 - 0.9)            | 2.1 (1.2 - 3.0)            | 3.7 (2.5 - 4.9)            | 5.2 (3.8 - 6.7)            |
| 1980s                      | 0.0 (0.0 - 0.0)            | 0.6 (0.2 - 1.1)            | 1.8 (1.1 - 2.5)            | 3.4 (2.3 - 4.4)            | 4.8 (3.3 - 6.2)            |
| 1990s                      | 0.2 (0.0 - 0.5)            | 1.1 (0.5 - 1.6)            | 2.3 (1.2 - 3.5)            | 6.1 (1.3 - 10.7)           |                            |
| HL survivors               |                            |                            |                            |                            |                            |
| All years                  | 0.2 (0.0 - 0.4)            | 1.9 (1.1 - 2.7)            | 4.9 (3.6 - 6.3)            | 7.5 (5.7 - 9.2)            | 10.1 (7.8 - 12.2)          |
| 1970s                      | 0.0 (0.0 - 0.0)            | 0.9 (0.0 - 1.8)            | 4.6 (2.5 - 6.6)            | 7.0 (4.5 - 9.5)            | 10.6 (7.4 - 13.7)          |
| 1980s                      | 0.0 (0.0 - 0.0)            | 2.2 (0.8 - 3.6)            | 5.3 (3.0 - 7.5)            | 7.2 (4.5 - 9.9)            | 8.0 (5.1 - 10.9)           |
| 1990s                      | 0.5 (0.0 - 1.2)            | 2.8 (1.1 - 4.4)            | 4.5 (2.1 - 6.9)            | 11.4 (2.7 - 19.4)          |                            |
| HL survivors with chest RT |                            |                            |                            |                            |                            |
| All years                  | 0.1 (0.0 - 0.3)            | 2.3 (1.4 - 3.3)            | 5.8 (4.3 - 7.4)            | 8.6 (6.5 - 10.6)           | 11.4 (8.8 - 13.9)          |
| 1970s                      | 0.0 (0.0 - 0.0)            | 1.1 (0.0 - 2.1)            | 5.1 (2.8 - 7.3)            | 7.9 (5.0 - 10.7)           | 11.9 (8.3 - 15.5)          |
| 1980s                      | 0.0 (0.0 - 0.0)            | 2.8 (1.0 - 4.7)            | 6.4 (3.5 - 9.1)            | 8.0 (4.8 - 11.2)           | 8.5 (5.2 - 11.8)           |
| 1990s                      | 0.3 (0.0 - 1.0)            | 3.5 (1.2 - 5.7)            | 5.9 (2.6 - 9.0)            | 14.3 (3.6 - 23.7)          |                            |
| Survivors other than HL    |                            |                            |                            |                            |                            |
| All years                  | 0.1 (0.0 - 0.1)            | 0.2 (0.0 - 0.4)            | 0.6 (0.3 - 1.0)            | 1.8 (1.1 - 2.4)            | 2.6 (1.7 - 3.6)            |

|       |                 |                 |                 |                 |                 |
|-------|-----------------|-----------------|-----------------|-----------------|-----------------|
| 1970s | 0.0 (0.0 - 0.0) | 0.2 (0.0 - 0.5) | 0.5 (0.0 - 1.0) | 1.4 (0.4 - 2.4) | 1.6 (0.6 - 2.7) |
| 1980s | 0.0 (0.0 - 0.0) | 0.0 (0.0 - 0.0) | 0.3 (0.0 - 0.7) | 1.7 (0.7 - 2.7) | 3.5 (1.7 - 5.1) |
| 1990s | 0.1 (0.0 - 0.3) | 0.4 (0.0 - 0.8) | 1.5 (0.2 - 2.8) | 1.5 (0.2 - 2.8) |                 |

**eTable 6. Cumulative incidence (%) by age for all breast cancers, invasive breast cancer and DCIS**

|                            | By age 30 yr<br>% (95% CI) | By age 35 yr<br>% (95% CI) | By age 40 yr<br>% (95% CI) | By age 45 yr<br>% (95% CI) | By age 50 yr<br>% (95% CI) |
|----------------------------|----------------------------|----------------------------|----------------------------|----------------------------|----------------------------|
| <b>All BC</b>              |                            |                            |                            |                            |                            |
| Entire cohort              |                            |                            |                            |                            |                            |
| All years                  | 0.4 (0.3 - 0.6)            | 1.6 (1.4 - 1.9)            | 4.1 (3.6 - 4.6)            | 8.1 (7.3 - 9.0)            | 13.5 (12.1 - 14.9)         |
| 1970s                      | 0.7 (0.4 - 1.0)            | 1.7 (1.2 - 2.2)            | 4.4 (3.6 - 5.3)            | 7.8 (6.6 - 9.0)            | 12.6 (10.9 - 14.2)         |
| 1980s                      | 0.3 (0.2 - 0.5)            | 1.4 (1.0 - 1.8)            | 3.6 (2.9 - 4.4)            | 8.4 (6.9 - 9.9)            | 14.9 (12.2 - 17.5)         |
| 1990s                      | 0.4 (0.2 - 0.6)            | 1.9 (1.3 - 2.6)            | 4.7 (3.1 - 6.4)            | 11.5 (5.9 - 16.8)          |                            |
| HL survivors               |                            |                            |                            |                            |                            |
| All years                  | 1.2 (0.6 - 1.8)            | 5.0 (3.8 - 6.1)            | 11.8 (9.9 - 13.7)          | 19.3 (16.7 - 21.8)         | 29.4 (25.9 - 32.8)         |
| 1970s                      | 1.8 (0.6 - 3.0)            | 4.4 (2.6 - 6.2)            | 13.2 (10.0 - 16.2)         | 20.0 (16.2 - 23.6)         | 29.9 (25.2 - 34.3)         |
| 1980s                      | 0.9 (0.0 - 1.8)            | 5.1 (3.0 - 7.1)            | 11.1 (8.0 - 14.2)          | 18.7 (14.5 - 22.7)         | 28.4 (22.5 - 33.9)         |
| 1990s                      | 0.9 (0.0 - 1.9)            | 5.6 (3.2 - 7.9)            | 9.8 (6.0 - 13.5)           | 19.7 (9.9 - 28.4)          |                            |
| HL survivors with chest RT |                            |                            |                            |                            |                            |
| All years                  | 1.3 (0.6 - 2.0)            | 5.6 (4.1 - 7.0)            | 13.8 (11.5 - 16.0)         | 20.9 (17.9 - 23.8)         | 31.9 (28.0 - 35.7)         |
| 1970s                      | 2.0 (0.6 - 3.3)            | 4.7 (2.6 - 6.7)            | 14.9 (11.2 - 18.3)         | 21.8 (17.4 - 25.8)         | 32.2 (27.0 - 37.0)         |
| 1980s                      | 0.9 (0.0 - 1.9)            | 6.1 (3.5 - 8.6)            | 13.2 (9.3 - 16.9)          | 20.4 (15.5 - 25.1)         | 31.9 (24.9 - 38.2)         |
| 1990s                      | 1.0 (0.0 - 2.2)            | 6.3 (3.4 - 9.2)            | 12.0 (7.1 - 16.7)          | 20.4 (9.2 - 30.2)          |                            |
| Non-HL survivors           |                            |                            |                            |                            |                            |
| All years                  | 0.3 (0.2 - 0.4)            | 1.0 (0.7 - 1.2)            | 2.2 (1.8 - 2.6)            | 5.0 (4.2 - 5.9)            | 8.0 (6.7 - 9.3)            |
| 1970s                      | 0.4 (0.1 - 0.7)            | 1.1 (0.7 - 1.6)            | 2.2 (1.6 - 2.9)            | 4.6 (3.5 - 5.6)            | 7.0 (5.5 - 8.4)            |
| 1980s                      | 0.3 (0.1 - 0.4)            | 0.9 (0.6 - 1.2)            | 2.1 (1.5 - 2.8)            | 5.8 (4.3 - 7.2)            | 9.8 (7.2 - 12.4)           |
| 1990s                      | 0.3 (0.1 - 0.4)            | 0.8 (0.3 - 1.2)            | 2.8 (1.0 - 4.5)            | 6.2 (1.1 - 11.1)           |                            |
| <b>Invasive BC</b>         |                            |                            |                            |                            |                            |
| Entire cohort              |                            |                            |                            |                            |                            |
| All years                  | 0.4 (0.3 - 0.5)            | 1.4 (1.1 - 1.6)            | 3.1 (2.6 - 3.5)            | 6.2 (5.4 - 7.0)            | 10.7 (9.4 - 12.0)          |
| 1970s                      | 0.6 (0.3 - 0.9)            | 1.5 (1.1 - 2.0)            | 3.5 (2.7 - 4.2)            | 6.3 (5.2 - 7.3)            | 10.3 (8.7 - 11.8)          |
| 1980s                      | 0.3 (0.1 - 0.5)            | 1.2 (0.9 - 1.6)            | 2.8 (2.1 - 3.4)            | 6.4 (5.1 - 7.7)            | 11.9 (9.4 - 14.3)          |
| 1990s                      | 0.3 (0.1 - 0.5)            | 1.4 (0.8 - 2.0)            | 2.9 (1.6 - 4.2)            | 6.0 (2.8 - 9.0)            |                            |
| HL survivors               |                            |                            |                            |                            |                            |
| All years                  | 1.1 (0.5 - 1.6)            | 3.8 (2.8 - 4.8)            | 8.1 (6.5 - 9.6)            | 14.2 (11.9 - 16.5)         | 22.7 (19.5 - 25.8)         |
| 1970s                      | 1.8 (0.6 - 3.0)            | 3.8 (2.1 - 5.5)            | 9.3 (6.6 - 11.9)           | 15.6 (12.2 - 18.9)         | 23.5 (19.2 - 27.6)         |
| 1980s                      | 0.9 (0.0 - 1.8)            | 3.9 (2.1 - 5.7)            | 7.9 (5.2 - 10.5)           | 13.8 (10.1 - 17.4)         | 22.8 (17.2 - 28.0)         |
| 1990s                      | 0.5 (0.0 - 1.1)            | 3.7 (1.8 - 5.6)            | 6.3 (3.1 - 9.4)            | 9.2 (4.6 - 13.6)           |                            |
| HL survivors with chest RT |                            |                            |                            |                            |                            |
| All years                  | 1.3 (0.6 - 1.9)            | 4.2 (2.9 - 5.4)            | 9.4 (7.5 - 11.3)           | 15.2 (12.6 - 17.8)         | 24.4 (20.8 - 27.9)         |
| 1970s                      | 2.0 (0.6 - 3.3)            | 3.9 (2.0 - 5.8)            | 10.5 (7.4 - 13.5)          | 16.8 (12.9 - 20.5)         | 24.9 (20.1 - 29.4)         |
| 1980s                      | 0.9 (0.0 - 1.9)            | 4.5 (2.3 - 6.8)            | 9.3 (6.0 - 12.5)           | 15.3 (10.9 - 19.5)         | 26.3 (19.6 - 32.4)         |
| 1990s                      | 0.7 (0.0 - 1.6)            | 4.1 (1.7 - 6.4)            | 7.4 (3.3 - 11.3)           | 7.4 (3.3 - 11.3)           |                            |
| Non-HL survivors           |                            |                            |                            |                            |                            |
| All years                  | 0.3 (0.2 - 0.4)            | 0.9 (0.7 - 1.1)            | 1.9 (1.5 - 2.2)            | 4.0 (3.3 - 4.7)            | 6.5 (5.3 - 7.7)            |
| 1970s                      | 0.4 (0.1 - 0.6)            | 1.0 (0.6 - 1.4)            | 2.0 (1.4 - 2.7)            | 3.8 (2.9 - 4.7)            | 6.0 (4.7 - 7.4)            |
| 1980s                      | 0.2 (0.1 - 0.4)            | 0.8 (0.5 - 1.2)            | 1.8 (1.2 - 2.4)            | 4.4 (3.1 - 5.6)            | 7.4 (5.1 - 9.6)            |
| 1990s                      | 0.3 (0.1 - 0.4)            | 0.7 (0.3 - 1.1)            | 1.6 (0.3 - 2.7)            | 5.0 (0.0 - 9.8)            |                            |
| <b>DCIS</b>                |                            |                            |                            |                            |                            |
| Entire cohort              |                            |                            |                            |                            |                            |
| All years                  | 0.0 (0.0 - 0.1)            | 0.4 (0.3 - 0.6)            | 1.3 (1.0 - 1.6)            | 2.5 (2.0 - 3.0)            | 3.7 (3.0 - 4.5)            |
| 1970s                      | 0.0 (0.0 - 0.1)            | 0.3 (0.1 - 0.5)            | 1.1 (0.7 - 1.6)            | 2.2 (1.6 - 2.9)            | 3.3 (2.4 - 4.2)            |
| 1980s                      | 0.0 (0.0 - 0.1)            | 0.3 (0.1 - 0.5)            | 1.1 (0.7 - 1.6)            | 2.5 (1.7 - 3.3)            | 3.9 (2.6 - 5.1)            |
| 1990s                      | 0.1 (0.0 - 0.2)            | 0.8 (0.4 - 1.2)            | 2.1 (1.0 - 3.1)            | 5.9 (1.0 - 10.4)           |                            |
| HL survivors               |                            |                            |                            |                            |                            |
| All years                  | 0.2 (0.0 - 0.4)            | 1.8 (1.1 - 2.5)            | 4.7 (3.4 - 5.9)            | 7.2 (5.5 - 8.9)            | 9.7 (7.6 - 11.8)           |
| 1970s                      | 0.0 (0.0 - 0.0)            | 0.8 (0.0 - 1.6)            | 4.2 (2.3 - 6.0)            | 6.7 (4.3 - 9.0)            | 10.1 (7.0 - 13.0)          |
| 1980s                      | 0.0 (0.0 - 0.0)            | 2.1 (0.7 - 3.4)            | 5.0 (2.8 - 7.1)            | 6.9 (4.3 - 9.5)            | 7.7 (4.9 - 10.5)           |
| 1990s                      | 0.5 (0.0 - 1.1)            | 2.7 (1.0 - 4.3)            | 4.4 (2.0 - 6.7)            | 11.4 (2.6 - 19.4)          |                            |
| HL survivors with chest RT |                            |                            |                            |                            |                            |



|                                |                 |                 |                 |                   |                   |
|--------------------------------|-----------------|-----------------|-----------------|-------------------|-------------------|
| All years                      | 0.1 (0.0 - 0.3) | 2.2 (1.3 - 3.1) | 5.6 (4.1 - 7.1) | 8.4 (6.4 - 10.3)  | 11.1 (8.6 - 13.6) |
| 1970s                          | 0.0 (0.0 - 0.0) | 1.0 (0.0 - 2.0) | 4.7 (2.6 - 6.8) | 7.7 (4.9 - 10.4)  | 11.6 (8.0 - 15.0) |
| 1980s                          | 0.0 (0.0 - 0.0) | 2.7 (1.0 - 4.5) | 6.2 (3.4 - 8.8) | 7.8 (4.7 - 10.9)  | 8.3 (5.0 - 11.5)  |
| 1990s                          | 0.3 (0.0 - 1.0) | 3.4 (1.2 - 5.6) | 5.8 (2.5 - 8.9) | 14.2 (3.5 - 23.7) |                   |
| <b>Survivors other than HL</b> |                 |                 |                 |                   |                   |
| All years                      | 0.0 (0.0 - 0.1) | 0.1 (0.1 - 0.2) | 0.4 (0.2 - 0.6) | 1.3 (0.8 - 1.7)   | 1.8 (1.2 - 2.5)   |
| 1970s                          | 0.0 (0.0 - 0.1) | 0.2 (0.0 - 0.4) | 0.4 (0.1 - 0.6) | 1.0 (0.5 - 1.5)   | 1.2 (0.6 - 1.7)   |
| 1980s                          | 0.0 (0.0 - 0.1) | 0.1 (0.0 - 0.1) | 0.3 (0.1 - 0.6) | 1.5 (0.7 - 2.3)   | 3.2 (1.6 - 4.8)   |
| 1990s                          | 0.0 (0.0 - 0.1) | 0.2 (0.0 - 0.4) | 1.3 (0.0 - 2.6) | 1.3 (0.0 - 2.6)   |                   |

**eTable 7. SIRs (95% CI) by age by treatment decade**

Entire cohort:

|                 | Age             | All years          | 1970s              | 1980s              | 1990s              |
|-----------------|-----------------|--------------------|--------------------|--------------------|--------------------|
| <b>All BCs</b>  | <30             | 9.6 (7.1 - 12.7)   | 16.9 (10.3 - 26.1) | 6.9 (3.8 - 11.5)   | 8.0 (4.4 - 13.3)   |
|                 | 30-39           | 9.0 (7.9 - 10.2)   | 10.1 (8.3 - 12.3)  | 7.7 (6.2 - 9.4)    | 10.1 (7.3 - 13.5)  |
|                 | 40-49           | 6.0 (5.2 - 6.8)    | 5.3 (4.5 - 6.3)    | 7.1 (5.8 - 8.6)    | 6.9 (3.0 - 13.6)   |
|                 | 50+             | 3.3 (2.4 - 4.3)    | 3.1 (2.2 - 4.2)    | 4.5 (2.1 - 8.6)    |                    |
|                 | <b>All ages</b> | 6.6 (6.1 - 7.2)    | 6.0 (5.3 - 6.7)    | 7.1 (6.2 - 8.1)    | 9.1 (7.0 - 11.5)   |
| <b>Invasive</b> | <30             | 9.4 (6.8 - 12.7)   | 17.3 (10.4 - 27.1) | 6.9 (3.7 - 11.9)   | 7.0 (3.6 - 12.4)   |
|                 | 30-39           | 7.2 (6.2 - 8.4)    | 8.7 (6.9 - 10.9)   | 6.3 (4.8 - 8.0)    | 6.3 (4.1 - 9.4)    |
|                 | 40-49           | 5.9 (5.1 - 6.8)    | 5.4 (4.4 - 6.5)    | 6.8 (5.4 - 8.6)    | 5.8 (1.9 - 13.6)   |
|                 | 50+             | 3.2 (2.3 - 4.5)    | 3.1 (2.1 - 4.5)    | 4.0 (1.5 - 8.7)    |                    |
|                 | <b>All ages</b> | 6.1 (5.6 - 6.7)    | 5.9 (5.2 - 6.7)    | 6.4 (5.5 - 7.5)    | 6.4 (4.6 - 8.7)    |
| <b>DCIS</b>     | <30             | 11.8 (3.8 - 27.5)  | 11.1 (0.1 - 61.5)  | 6.1 (0.1 - 33.7)   | 17.7 (3.6 - 51.8)  |
|                 | 30-39           | 20.9 (16.4 - 26.3) | 19.1 (12.6 - 27.8) | 16.9 (11.1 - 24.8) | 36.6 (22.4 - 56.3) |
|                 | 40-49           | 6.1 (4.8 - 7.8)    | 5.1 (3.5 - 7.1)    | 7.8 (5.2 - 11.2)   | 10.0 (2.0 - 29.2)  |
|                 | 50+             | 3.3 (1.7 - 5.8)    | 2.9 (1.3 - 5.5)    | 6.1 (1.2 - 17.8)   |                    |
|                 | <b>All ages</b> | 8.5 (7.3 - 10.0)   | 6.3 (4.9 - 7.9)    | 10.0 (7.6 - 12.9)  | 25.6 (16.8 - 37.5) |

All survivors exposed stratified by chest radiotherapy exposure:

|                     | Age             | All years          | 1970s              | 1980s              | 1990s                |
|---------------------|-----------------|--------------------|--------------------|--------------------|----------------------|
| <b>Chest RT Yes</b> |                 |                    |                    |                    |                      |
| <b>All BCs</b>      | <30             | 24.0 (15.7 - 35.1) | 43.2 (24.1 - 71.2) | 15.6 (5.7 - 33.9)  | 14.2 (4.6 - 33.2)    |
|                     | 30-39           | 22.8 (19.4 - 26.6) | 23.1 (18.0 - 29.1) | 20.8 (15.7 - 26.9) | 26.3 (18.3 - 36.5)   |
|                     | 40-49           | 10.6 (9.0 - 12.5)  | 10.3 (8.3 - 12.7)  | 11.7 (8.8 - 15.3)  | 6.0 (1.2 - 17.5)     |
|                     | 50+             | 6.1 (4.3 - 8.4)    | 5.5 (3.7 - 7.8)    | 10.6 (4.6 - 20.9)  |                      |
|                     | <b>All ages</b> | 13.2 (11.9 - 14.6) | 11.7 (10.2 - 13.4) | 14.7 (12.3 - 17.6) | 19.7 (14.3 - 26.5)   |
| <b>Invasive</b>     | <30             | 23.1 (14.6 - 34.6) | 46.6 (26.0 - 76.8) | 14.1 (4.5 - 32.9)  | 9.4 (1.9 - 27.4)     |
|                     | 30-39           | 17.1 (14.0 - 20.7) | 19.6 (14.7 - 25.6) | 15.6 (11.0 - 21.5) | 14.5 (8.4 - 23.2)    |
|                     | 40-49           | 10.3 (8.4 - 12.4)  | 9.8 (7.6 - 12.5)   | 12.2 (8.8 - 16.6)  | 0.0 (0.0 - 10.0)     |
|                     | 50+             | 6.3 (4.3 - 9.1)    | 6.0 (3.9 - 8.9)    | 8.8 (2.8 - 20.5)   |                      |
|                     | <b>All ages</b> | 11.9 (10.5 - 13.4) | 11.4 (9.7 - 13.4)  | 13.2 (10.6 - 16.3) | 10.7 (6.5 - 16.6)    |
| <b>DCIS</b>         | <30             | 34.4 (6.9 - 100.5) | 0.0 (0.0 - 145.7)  | 32.7 (0.4 - 181.8) | 64.0 (7.2 - 231.0)   |
|                     | 30-39           | 60.2 (45.6 - 78.0) | 46.1 (27.7 - 71.9) | 54.0 (33.0 - 83.4) | 109.1 (64.8 - 172.0) |
|                     | 40-49           | 11.7 (8.4 - 15.8)  | 11.8 (7.7 - 17.3)  | 10.2 (5.3 - 17.9)  | 23.2 (4.7 - 67.7)    |
|                     | 50+             | 5.3 (2.3 - 10.5)   | 3.8 (1.2 - 8.9)    | 16.2 (3.3 - 47.3)  |                      |
|                     | <b>All ages</b> | 18.1 (14.8 - 21.8) | 12.6 (9.4 - 16.7)  | 20.5 (14.3 - 28.3) | 70.8 (45.0 - 106.1)  |
| <b>Chest RT No</b>  |                 |                    |                    |                    |                      |
| <b>All BCs</b>      | <30             | 5.5 (3.3 - 8.5)    | 5.7 (1.5 - 14.6)   | 4.1 (1.5 - 8.8)    | 7.0 (3.3 - 13.0)     |
|                     | 30-39           | 3.3 (2.5 - 4.3)    | 3.6 (2.3 - 5.4)    | 3.1 (2.0 - 4.6)    | 3.1 (1.4 - 6.0)      |
|                     | 40-49           | 3.5 (2.8 - 4.3)    | 2.7 (2.0 - 3.7)    | 4.8 (3.5 - 6.5)    | 5.2 (1.0 - 15.1)     |
|                     | 50+             | 1.2 (0.5 - 2.2)    | 1.3 (0.6 - 2.5)    | 0.0 (0.0 - 3.8)    |                      |
|                     | <b>All ages</b> | 3.2 (2.8 - 3.7)    | 2.7 (2.1 - 3.3)    | 3.8 (3.0 - 4.8)    | 4.5 (2.8 - 6.8)      |
| <b>Invasive</b>     | <30             | 5.4 (3.2 - 8.6)    | 4.6 (0.9 - 13.5)   | 4.4 (1.6 - 9.6)    | 6.9 (3.1 - 13.2)     |
|                     | 30-39           | 3.1 (2.2 - 4.1)    | 3.3 (1.9 - 5.2)    | 3.0 (1.8 - 4.6)    | 2.8 (1.1 - 5.7)      |
|                     | 40-49           | 3.6 (2.8 - 4.5)    | 3.0 (2.1 - 4.2)    | 4.3 (2.8 - 6.2)    | 7.0 (1.4 - 20.4)     |
|                     | 50+             | 0.8 (0.3 - 2.0)    | 1.0 (0.3 - 2.2)    | 0.0 (0.0 - 5.1)    |                      |
|                     | <b>All ages</b> | 3.1 (2.6 - 3.7)    | 2.7 (2.0 - 3.4)    | 3.5 (2.6 - 4.6)    | 4.4 (2.7 - 7.0)      |
| <b>DCIS</b>         | <30             | 6.6 (0.7 - 23.7)   | 18.2 (0.2 - 101.2) | 0.0 (0.0 - 30.7)   | 7.8 (0.1 - 43.1)     |
|                     | 30-39           | 4.9 (2.4 - 8.7)    | 5.8 (1.9 - 13.5)   | 3.9 (1.0 - 9.9)    | 5.7 (0.6 - 20.6)     |
|                     | 40-49           | 3.3 (2.1 - 5.1)    | 1.8 (0.7 - 3.6)    | 6.3 (3.5 - 10.7)   | 0.0 (0.0 - 24.4)     |
|                     | 50+             | 2.1 (0.6 - 5.4)    | 2.4 (0.7 - 6.2)    | 0.0 (0.0 - 15.4)   |                      |
|                     | <b>All ages</b> | 3.5 (2.5 - 4.8)    | 2.6 (1.5 - 4.2)    | 5.0 (3.0 - 7.9)    | 4.8 (1.0 - 13.9)     |

HL survivors:

|                | Age             | All years          | 1970s              | 1980s              | 1990s              |
|----------------|-----------------|--------------------|--------------------|--------------------|--------------------|
| <b>All BCs</b> | <30             | 27.5 (16.3 - 43.4) | 45.8 (21.9 - 84.3) | 19.4 (5.2 - 49.6)  | 17.3 (4.7 - 44.3)  |
|                | 30-39           | 27.8 (23.4 - 32.7) | 31.5 (24.2 - 40.3) | 26.8 (19.9 - 35.3) | 23.3 (15.7 - 33.3) |
|                | 40-49           | 13.3 (11.2 - 15.7) | 13.9 (11.1 - 17.3) | 12.7 (9.5 - 16.7)  | 11.1 (4.0 - 24.1)  |
|                | 50+             | 6.6 (4.6 - 9.2)    | 5.7 (3.8 - 8.4)    | 11.5 (5.2 - 21.8)  |                    |
|                | <b>All ages</b> | 15.5 (13.9 - 17.3) | 14.3 (12.3 - 16.6) | 16.5 (13.7 - 19.8) | 19.4 (13.9 - 26.5) |

|                 |                 |                     |                     |                     |                     |
|-----------------|-----------------|---------------------|---------------------|---------------------|---------------------|
| <b>Invasive</b> | <b>&lt;30</b>   | 26.5 (15.1 - 43.0)  | 49.3 (23.6 - 90.6)  | 20.9 (5.6 - 53.6)   | 9.5 (1.1 - 34.3)    |
|                 | <b>30-39</b>    | 20.1 (16.2 - 24.7)  | 24.7 (17.8 - 33.2)  | 18.7 (12.6 - 26.7)  | 15.1 (8.8 - 24.2)   |
|                 | <b>40-49</b>    | 12.8 (10.5 - 15.6)  | 13.2 (10.1 - 17.0)  | 13.0 (9.3 - 17.7)   | 7.5 (1.5 - 21.8)    |
|                 | <b>50+</b>      | 6.9 (4.6 - 10.0)    | 6.4 (4.0 - 9.7)     | 10.2 (3.7 - 22.1)   |                     |
|                 | <b>All ages</b> | 13.8 (12.1 - 15.7)  | 13.6 (11.4 - 16.1)  | 14.6 (11.6 - 18.2)  | 12.7 (7.9 - 19.2)   |
| <b>DCIS</b>     | <b>&lt;30</b>   | 39.4 (4.4 - 142.2)  | 0.0 (0.0 - 244.2)   | 0.0 (0.0 - 240.1)   | 98.5 (11.1 - 355.5) |
|                 | <b>30-39</b>    | 78.3 (58.7 - 102.5) | 78.1 (47.7 - 120.6) | 77.0 (47.0 - 118.9) | 80.8 (43.0 - 138.2) |
|                 | <b>40-49</b>    | 14.8 (10.6 - 20.2)  | 16.2 (10.4 - 24.1)  | 12.1 (6.4 - 20.7)   | 21.4 (4.3 - 62.5)   |
|                 | <b>50+</b>      | 5.5 (2.2 - 11.3)    | 3.7 (1.0 - 9.5)     | 15.6 (3.1 - 45.5)   |                     |
|                 | <b>All ages</b> | 21.7 (17.7 - 26.3)  | 16.9 (12.5 - 22.4)  | 23.3 (16.3 - 32.3)  | 56.0 (33.2 - 88.5)  |

#### HL survivors with chest RT:

|                 | <b>Age</b>      | <b>All years</b>    | <b>1970s</b>        | <b>1980s</b>        | <b>1990s</b>         |
|-----------------|-----------------|---------------------|---------------------|---------------------|----------------------|
| <b>All BCs</b>  | <b>&lt;30</b>   | 31.1 (17.4 - 51.3)  | 51.2 (23.4 - 97.2)  | 19.7 (3.9 - 57.4)   | 19.5 (3.9 - 56.9)    |
|                 | <b>30-39</b>    | 33.0 (27.6 - 39.2)  | 35.7 (27.2 - 46.0)  | 32.3 (23.6 - 43.1)  | 29.4 (19.4 - 42.8)   |
|                 | <b>40-49</b>    | 14.1 (11.7 - 16.8)  | 14.8 (11.7 - 18.6)  | 13.9 (10.1 - 18.6)  | 7.1 (1.4 - 20.7)     |
|                 | <b>50+</b>      | 7.6 (5.3 - 10.6)    | 6.7 (4.4 - 9.8)     | 13.7 (5.9 - 26.9)   |                      |
|                 | <b>All ages</b> | 17.2 (15.3 - 19.2)  | 15.7 (13.4 - 18.2)  | 18.9 (15.4 - 22.9)  | 22.1 (15.2 - 31.0)   |
| <b>Invasive</b> | <b>&lt;30</b>   | 31.4 (17.2 - 52.7)  | 55.0 (25.1 - 104.4) | 21.2 (4.3 - 62.0)   | 14.3 (1.6 - 51.5)    |
|                 | <b>30-39</b>    | 23.3 (18.5 - 29.0)  | 27.7 (19.8 - 37.8)  | 22.0 (14.5 - 32.1)  | 17.4 (9.5 - 29.3)    |
|                 | <b>40-49</b>    | 13.4 (10.7 - 16.5)  | 13.7 (10.3 - 17.9)  | 14.6 (10.2 - 20.3)  | 0.0 (0.0 - 11.7)     |
|                 | <b>50+</b>      | 8.0 (5.2 - 11.6)    | 7.5 (4.7 - 11.3)    | 11.3 (3.6 - 26.4)   |                      |
|                 | <b>All ages</b> | 15.1 (13.1 - 17.3)  | 14.7 (12.2 - 17.5)  | 16.6 (13.0 - 21.0)  | 12.7 (7.3 - 20.7)    |
| <b>DCIS</b>     | <b>&lt;30</b>   | 27.1 (0.4 - 150.6)  | 0.0 (0.0 - 305.3)   | 0.0 (0.0 - 328.7)   | 73.4 (1.0 - 408.2)   |
|                 | <b>30-39</b>    | 97.0 (72.2 - 127.5) | 89.8 (54.1 - 140.3) | 95.4 (57.4 - 149.0) | 112.7 (59.9 - 192.7) |
|                 | <b>40-49</b>    | 16.3 (11.4 - 22.6)  | 18.3 (11.6 - 27.4)  | 11.9 (5.7 - 21.9)   | 27.3 (5.5 - 79.8)    |
|                 | <b>50+</b>      | 6.5 (2.6 - 13.5)    | 4.3 (1.2 - 11.0)    | 20.9 (4.2 - 61.1)   |                      |
|                 | <b>All ages</b> | 24.7 (20.0 - 30.2)  | 19.1 (14.0 - 25.4)  | 26.8 (18.3 - 37.9)  | 71.2 (41.4 - 114.0)  |

#### Survivors other than HL:

|                 | <b>Age</b>      | <b>All years</b> | <b>1970s</b>      | <b>1980s</b>     | <b>1990s</b>      |
|-----------------|-----------------|------------------|-------------------|------------------|-------------------|
| <b>All BCs</b>  | <b>&lt;30</b>   | 7.0 (4.7 - 9.9)  | 10.3 (4.9 - 19.0) | 5.5 (2.6 - 10.0) | 6.7 (3.3 - 12.0)  |
|                 | <b>30-39</b>    | 4.5 (3.7 - 5.5)  | 5.1 (3.7 - 6.8)   | 4.0 (2.9 - 5.5)  | 4.7 (2.7 - 7.8)   |
|                 | <b>40-49</b>    | 3.4 (2.8 - 4.1)  | 2.8 (2.1 - 3.6)   | 4.8 (3.5 - 6.3)  | 3.2 (0.4 - 11.7)  |
|                 | <b>50+</b>      | 1.4 (0.8 - 2.4)  | 1.6 (0.9 - 2.8)   | 0.0 (0.0 - 3.0)  |                   |
|                 | <b>All ages</b> | 3.7 (3.3 - 4.2)  | 3.2 (2.7 - 3.8)   | 4.3 (3.5 - 5.2)  | 5.1 (3.4 - 7.4)   |
| <b>Invasive</b> | <b>&lt;30</b>   | 6.9 (4.6 - 10.0) | 10.1 (4.6 - 19.2) | 5.3 (2.4 - 10.2) | 6.7 (3.1 - 12.4)  |
|                 | <b>30-39</b>    | 4.2 (3.3 - 5.2)  | 4.9 (3.5 - 6.8)   | 3.9 (2.7 - 5.5)  | 2.8 (1.2 - 5.6)   |
|                 | <b>40-49</b>    | 3.5 (2.8 - 4.3)  | 3.0 (2.2 - 4.1)   | 4.4 (3.0 - 6.1)  | 4.4 (0.5 - 15.8)  |
|                 | <b>50+</b>      | 1.2 (0.6 - 2.3)  | 1.4 (0.6 - 2.7)   | 0.0 (0.0 - 4.0)  |                   |
|                 | <b>All ages</b> | 3.7 (3.2 - 4.2)  | 3.4 (2.7 - 4.1)   | 4.0 (3.2 - 5.1)  | 4.2 (2.5 - 6.4)   |
| <b>DCIS</b>     | <b>&lt;30</b>   | 8.0 (1.6 - 23.5) | 13.3 (0.2 - 73.8) | 6.7 (0.1 - 37.2) | 6.7 (0.1 - 37.4)  |
|                 | <b>30-39</b>    | 7.2 (4.4 - 11.0) | 6.1 (2.4 - 12.5)  | 4.7 (1.7 - 10.2) | 18.4 (7.5 - 37.5) |
|                 | <b>40-49</b>    | 3.2 (2.1 - 4.7)  | 1.9 (0.9 - 3.5)   | 6.0 (3.4 - 9.8)  | 0.0 (0.0 - 23.0)  |
|                 | <b>50+</b>      | 2.1 (0.7 - 5.0)  | 2.4 (0.8 - 5.7)   | 0.0 (0.0 - 12.3) |                   |
|                 | <b>All ages</b> | 4.0 (3.0 - 5.2)  | 2.7 (1.7 - 4.1)   | 5.3 (3.3 - 7.9)  | 11.7 (5.1 - 22.9) |

**eFigure 1. Cumulative incidence (%) curves by treatment decade among survivors diagnosed in 0-9 years old for all breast cancers, invasive breast cancer and DCIS (A. All childhood cancer survivors; B. All survivors except HL)**

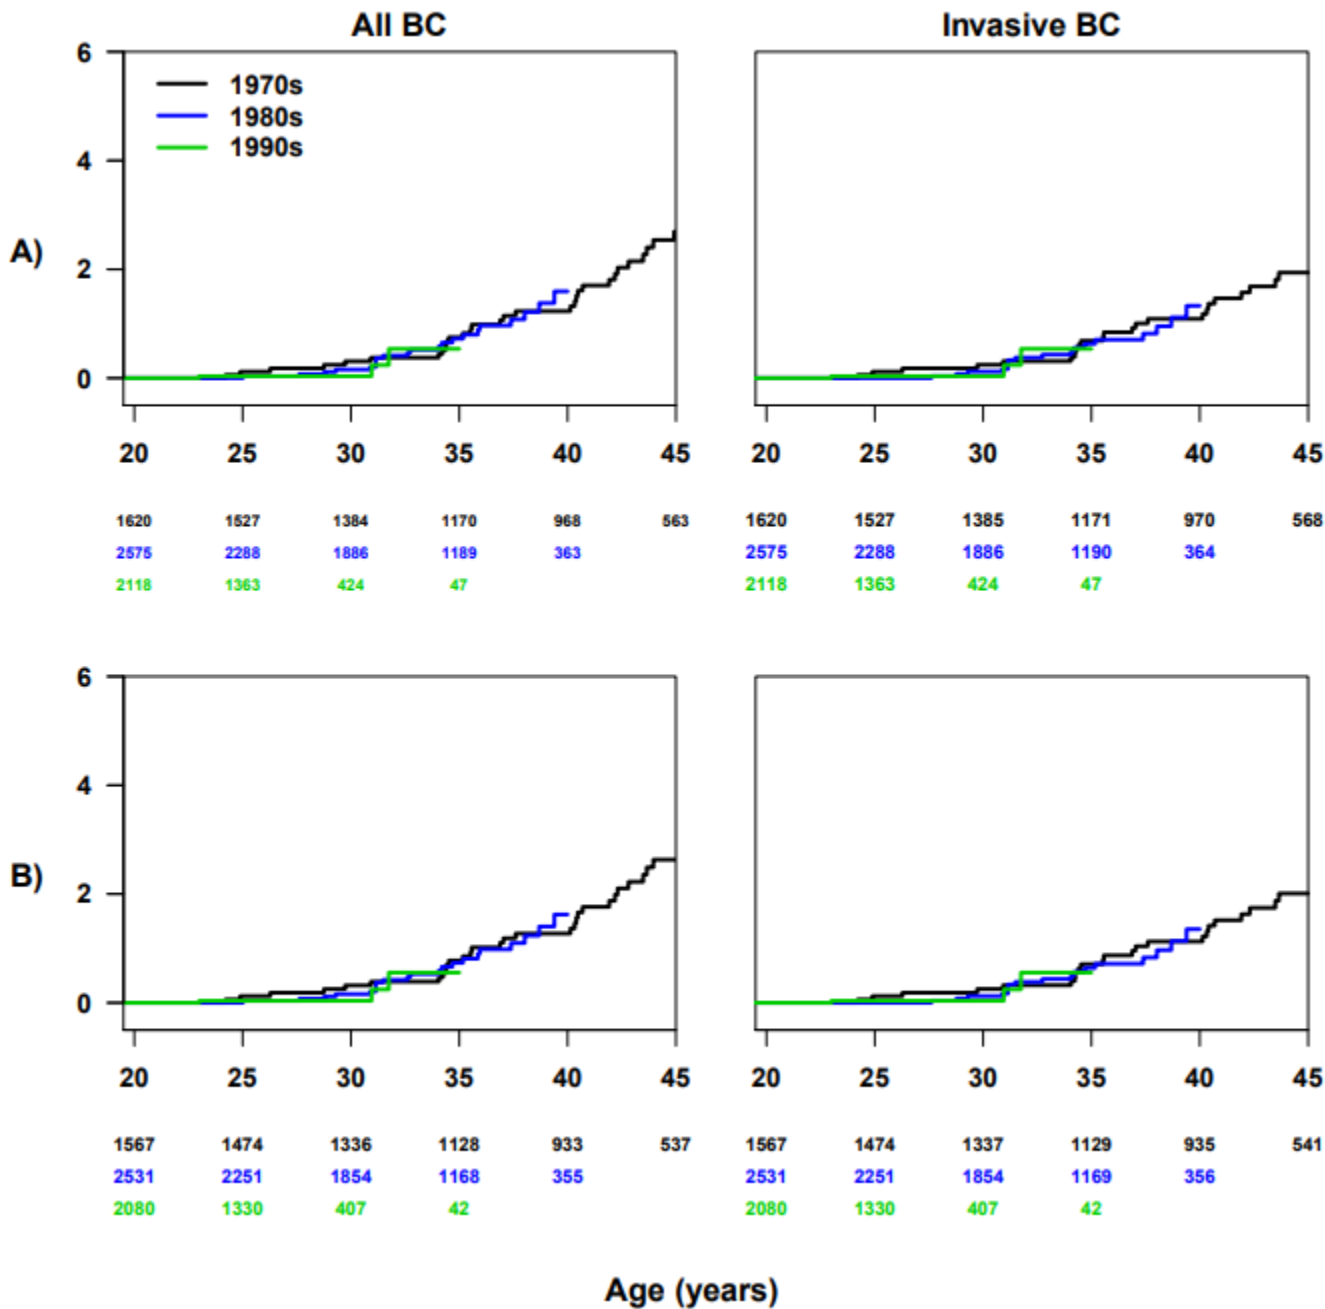

eFigure 2. Cumulative incidence (%) curves by treatment decade among survivors diagnosed in 10-20 years old for all breast cancers

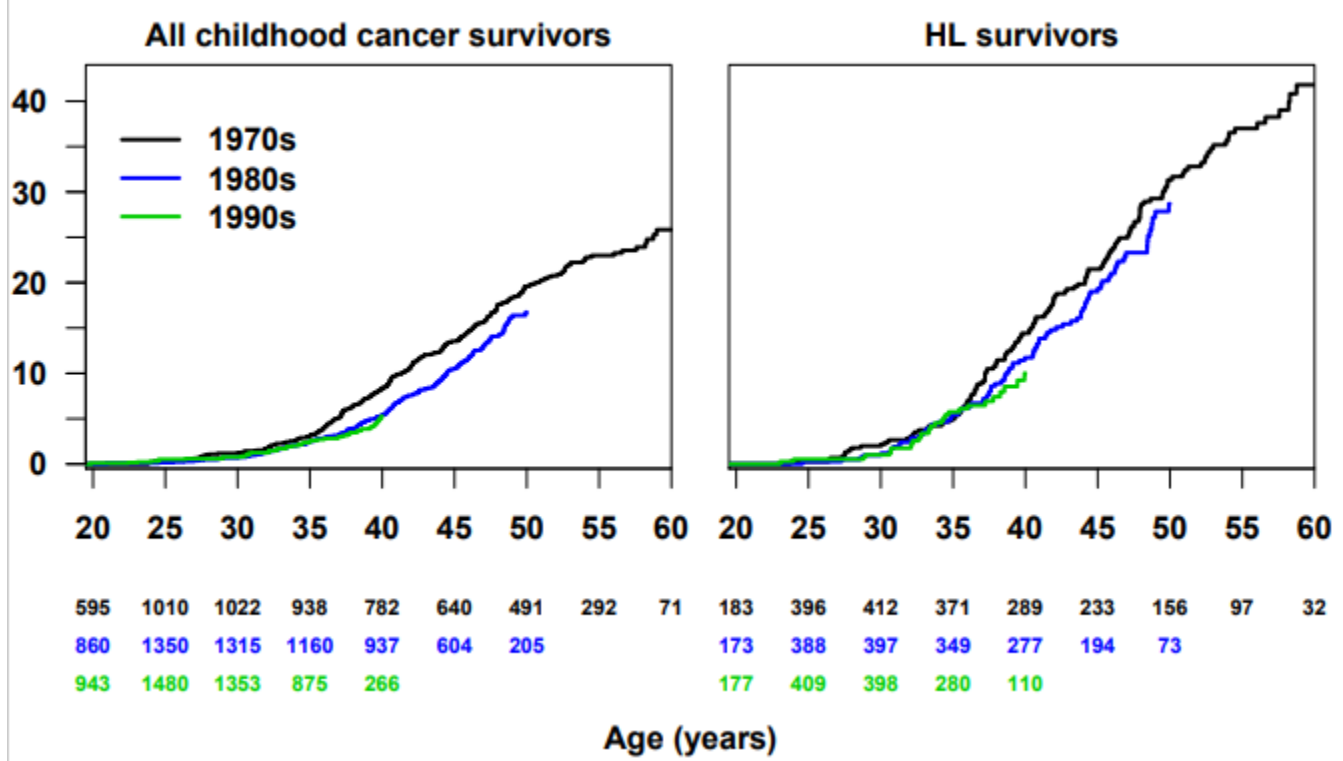

eFigure 3. Cumulative incidence (%) curves by treatment decade among survivors diagnosed in 10-20 years old for all breast cancers, invasive breast cancer and DCIS (A. HL survivors with chest RT; B. All survivors except HL)

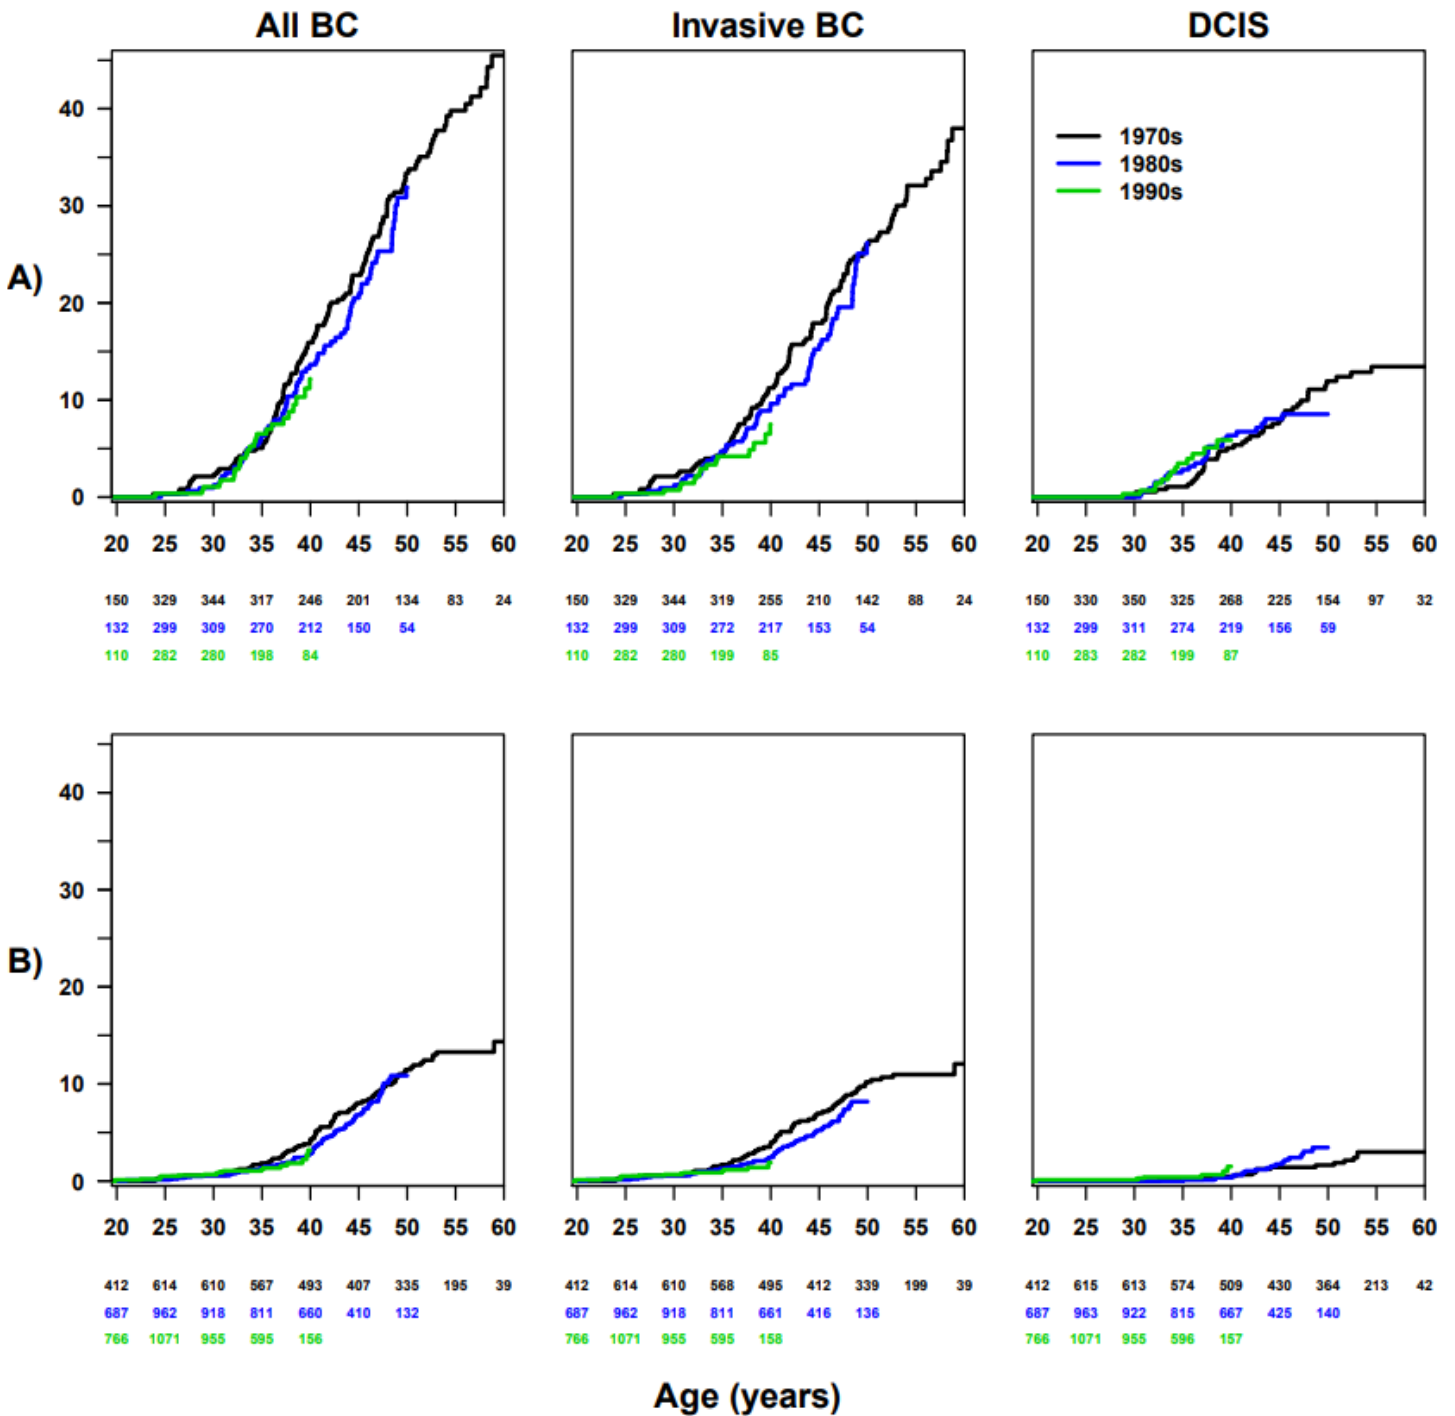

eFigure 4. SIRs (95% CI) of all breast cancers by age by treatment decade in all survivors and HL survivors

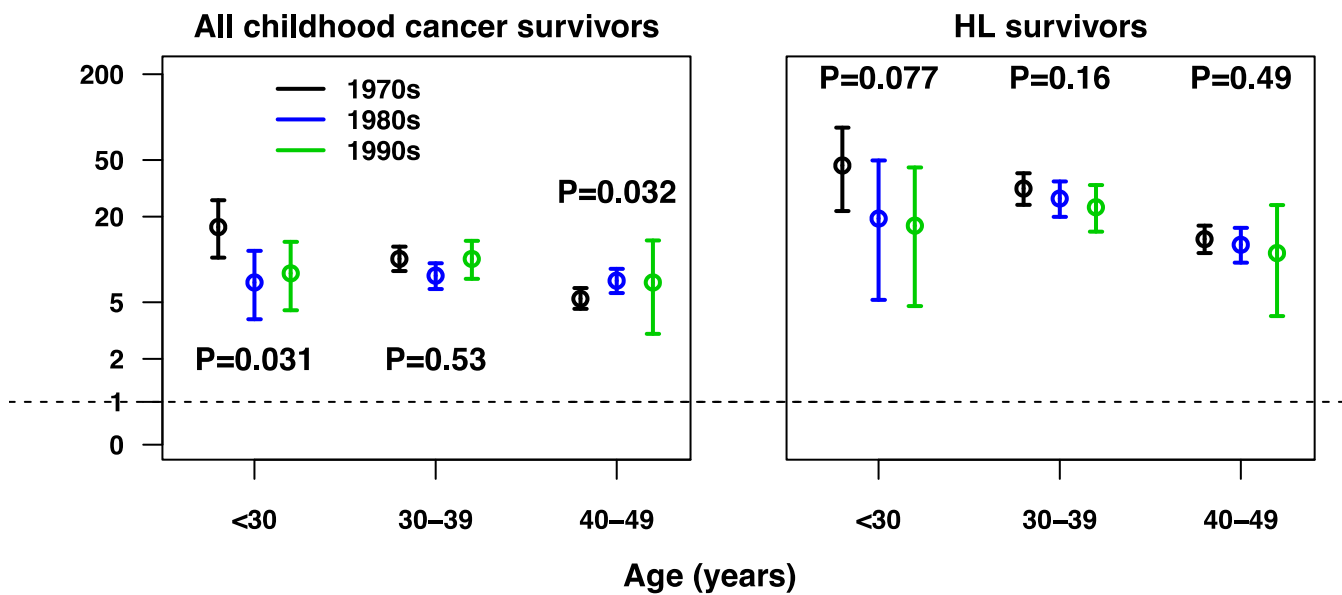

eFigure 5. SIRs (95% CI) by age by treatment decade in all survivors stratified by exposure to chest radiotherapy

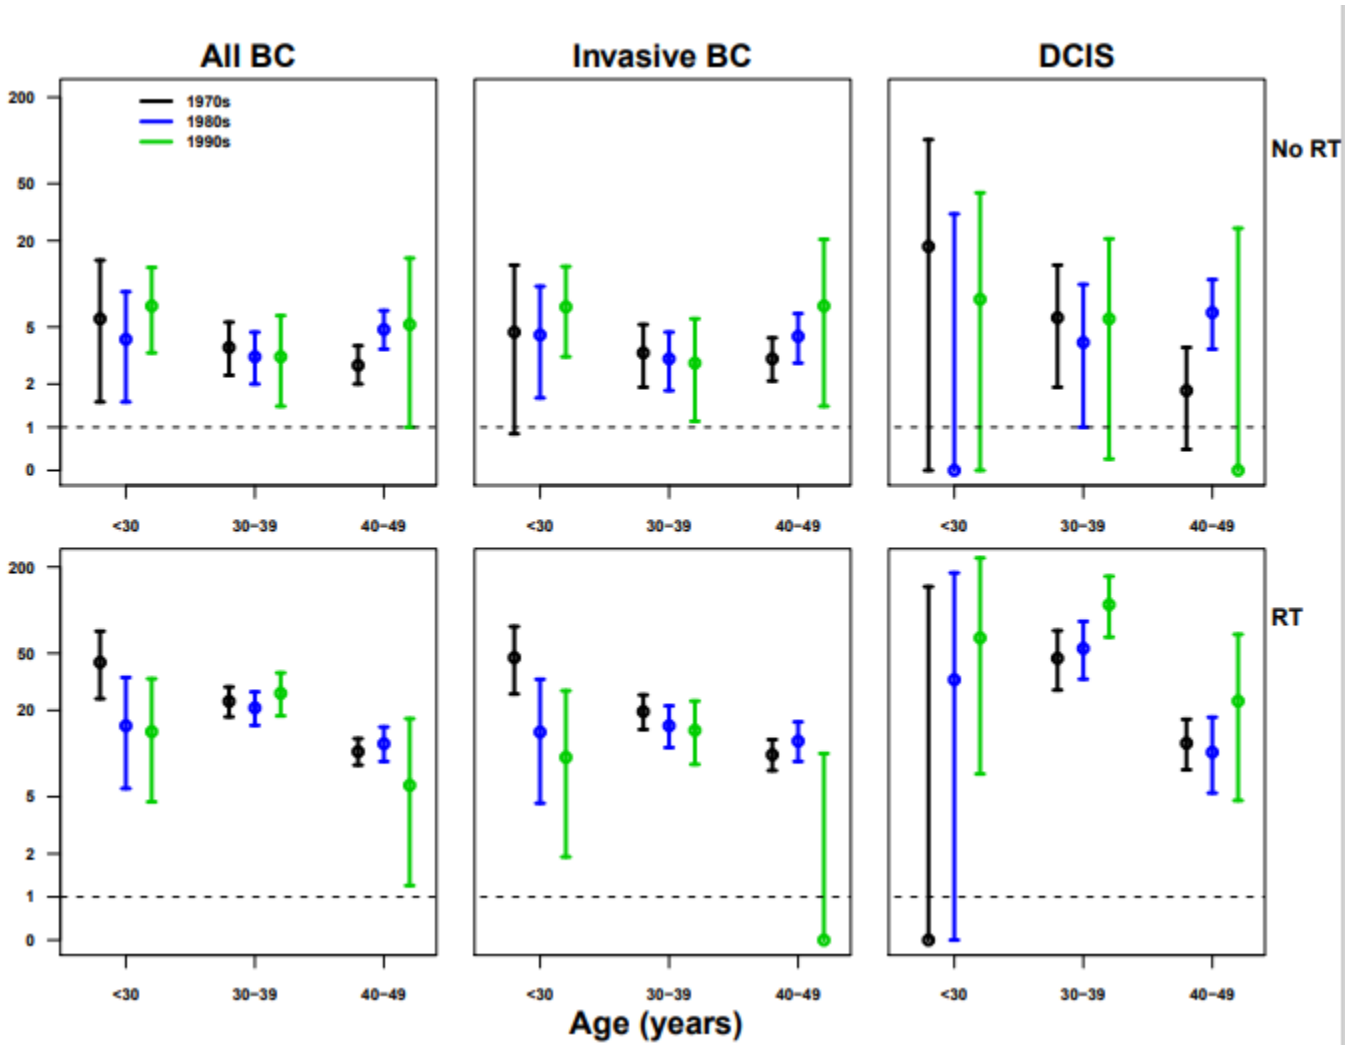

Supplement: jamaoncol-e224649-s001.pdf [file jamaoncol-e224649-s001.pdf]
